# Supplementary material for: Microfluidic chip for monitoring Ca2+transport through a confluent layer of intestinal cells
Source: Royal Society of Chemistry journal article supplement (doi:10.1039/c4ra09370d), 2014-01-01
Supplement: c4ra09370d1.pdf [file c4ra09370d1.pdf]

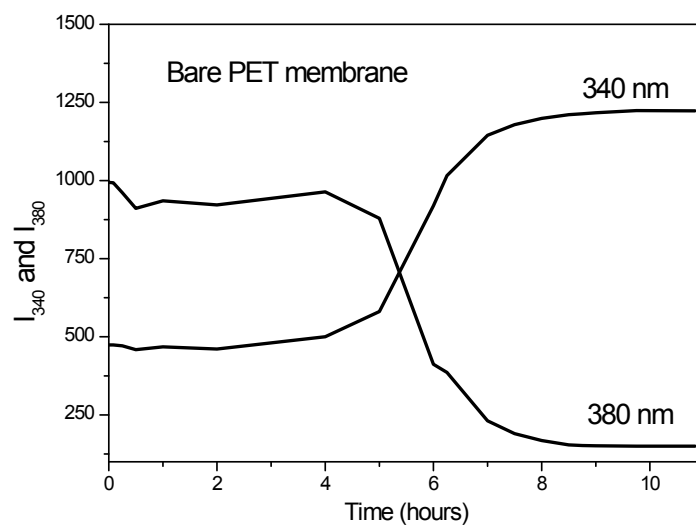

(a)

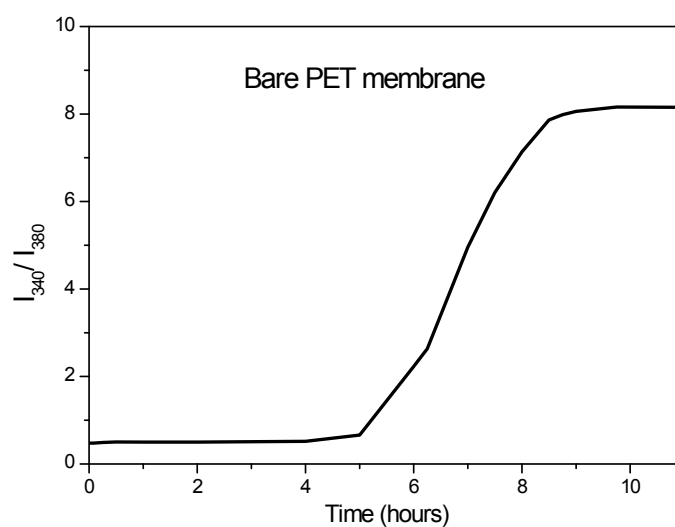

(b)

**Figure S1:** (a) Fluorescent intensities in the basolateral compartment of our microfluidic chip:  $I_{340}$  is increasing with time and  $I_{380}$  shows the opposite trend; (b) is the calculated ratio  $I_{340}/I_{380}$ .
